# Supplementary material
Source: publisher figshare collection journal article supplement (https://gsapubs.figshare.com/ndownloader/files/23301986)
Supplement: Supplementary file 1 [file 23301986]

## APPENDIX

### Supplementary methods

#### *Raman Spectroscopy*

All Raman spectroscopy analyses were conducted on a Jobin Yvon Horiba instrument connected to an Olympus BX41 machine. A 488 nm Ar<sup>+</sup> laser was used to excite the sample with a 50x objective, an exposure time of 25 seconds, and 40 repetition cycles to improve the signal to noise ratio. The Raman was set with a laser attenuation of 25% with respect to the total laser power, this was measured at the sample to be 1 mW, a 300 1/mm grating, confocal hole of 400  $\mu\text{m}$ , and slit of 100  $\mu\text{m}$ . Backscattered Raman radiation was collected over a range from 50 to 4000  $\text{cm}^{-1}$ , and elastically scattered photons were suppressed via a sharp edge filter. The instrument was calibrated using a silicon standard. The Labspec program was used to collect the spectra and an internal intensity correction (ICS HORIBA) was used to correct the detector intensities. Prior to processing, a wave number dependent intensity correction from Long (1977) has been applied to all the spectra. Scaled optical light images were taken using an in-built microscope camera to map the melt inclusions in the crystal and to measure exposed melt inclusion areas using Image J. When targeting melt inclusions, spectra with crystal interactions were discarded, so that only melt inclusions with no or minimal (<10%) crystallization (either post-entrapment, or contribution from the host) were measured, as qualitatively assessed using backscattered SEM imagery. A less intense beam (0.01%), was focused at the surface and then trial analyses were conducted on the melt inclusions for a few minutes to check if spectra contained a signature of the host crystal. 75% were discarded due to host crystal contamination. A few larger melt inclusions were independently measured with FTIR, producing H<sub>2</sub>O contents that overlap with those measured with the Raman. Five dacitic glasses with known H<sub>2</sub>O contents (using Fourier Transforming Infra-Red (FTIR), were measured on the Raman five times and averaged to calibrate the intensities gained from the Raman analysis (Table DR1). The resulting calibration had an R<sup>2</sup> of 0.99 (Fig. DR1). The standard error of the mean was calculated using the standard deviation of multiple measurements of Raman intensities on the same known dacitic glasses (Table DR1). This produced an average error of 0.17% and a maximum of 0.22%. The data table for the Raman H<sub>2</sub>O contents, along with crystal size, melt inclusion size, distance from the rim, and melt inclusion compositions can be found in Table DR4.

#### *EPMA, SEM and FTIR procedures*

After Raman analysis, the polished sections were carbon coated for electron probe microanalysis (EPMA) and scanning electron microscope (SEM) analysis. Plagioclase compositional traverses and melt inclusion glasses were measured with electron microprobe at the University of Mainz, using diffuse beam (5 microns) and correcting for

Na drift. All analyses used an accelerating voltage of 15 kV. For plagioclase a spot size of 4  $\mu\text{m}$  and a 100 nA beam current was used. For glasses, a 10  $\mu\text{m}$  spot was used with a beam current of 60 nA for Cl, F, S, P, Cr and Ni, and 4 nA for all other elements, with counting times of 50–200s per analysis. During glass measurements, Na peaks were counted first to avoid significant migration during the run. Only some melt inclusions measured with the Raman were sufficiently large enough also to measure with EPMA. Doubly polished wafers of 70  $\mu\text{m}$  thickness of feldspar crystals with melt inclusions were prepared for FTIR analysis at the University of Mainz.  $\text{H}_2\text{O}$  concentrations were calculated using absorption coefficients of  $68 \text{ L mol}^{-1}$  at 3650 nm from Yamashita et al., 1997. Glass densities were calculated from the relation after Olhorst et al, 2001 using dry densities calculated from partial-molar volumes of the major oxides (Lange and Carmichael 1990). These densities were then corrected for typical  $\text{H}_2\text{O}$  contents using equation 2 in Olhorst et al. (2001) for dacite compositions.

#### *Post Entrapment Crystallization*

This study focused on concentric zoned plagioclase, other crystals that display more complex textures (such as spongy, boxy-cellular) were avoided, as it is unclear if these crystals grew from progressively from core to rim (e.g. skeletal growth) and thus may affect the timing of entrapment of such melt inclusions. Post entrapment crystallization (PEC) of the melt inclusions was minimal, however to test what effect PEC could have on predicted temperatures, all melt inclusions were corrected for 20% crystallization of more albitic plagioclase using the approach of Humphreys et al. (2010). Despite this relatively large amount of PEC, this had only minimal effects on estimated temperatures ( $<15^\circ\text{C}$ ), similar to the error associated with the plagioclase thermometer (Waters and Lange, 2015). PEC is generally thought to have a minimal effect on  $\text{H}_2\text{O}$  concentrations (Steele-Macinnis et al., 2011).

#### *Magma Temperature Estimation*

Plagioclase composition is both a function of temperature and  $\text{H}_2\text{O}$ , this means it is hard to provide a test of equilibrium for this geothermometer because typically we do not know one or both of those values. An approximate test can be made by comparing the range of plagioclase compositions grown in in melt with those data used to calibrate the hygrometer in Lange, 2009 and Figure 3 in Waters and Lange 2015. Liquid anorthite values were calculated (Equation 7a and B in Waters and Lange, 2015) and plotted versus anorthite in plagioclase as in figure 3A in Waters and Lange 2015 (Fig. DR8). Those values which deviated from the experimental constraints used to test the model were discarded as being xeno/antecrystic or out of equilibrium (Fig. DR8).

In the case that these magmas were  $\text{H}_2\text{O}$  under saturated, the Waters and Lange (2015) model is still able to accurately calculate magma temperatures, as the composition of plagioclase in a given liquid is a function of temperature and wt%  $\text{H}_2\text{O}$  in the melt, regardless of varying  $\text{H}_2\text{O}$  saturation conditions. As a comparison to the Waters and Lange, 2015 model, we also used the hygrometer model of Putirka et al. (2005). This produces the same pattern in temperature fluctuations as seen in Figure 1, however often offset to lower temperatures ( $\sim 40^\circ\text{C}$ ). The plot for the temperatures calculated against anorthite can be found in Fig. DR9.

Jeffery et al., 2013 also estimate temperatures for the 2007 magma based on plagioclase-melt thermometry, using the Putirka et al., 2005 model. These range from

1151 - 1164 °C (average = 1160 °C; n = 303), and are therefore significantly higher than our estimations for the 2014 magma (985 – 1110°C; average 1062°C, Table DR4). Estimated H<sub>2</sub>O contents for the 2007 magma from Jeffrey et al., (2013) range from 0.12 – 2.29 wt%,  $1\sigma=0.57$  wt% using the difference method and 1.5-1.9 wt% using plagioclase-melt hygrometry, thus occupying a similar range to our FTIR and Raman measurements on the 2014 melt inclusions (0.45 - 2.3 wt%).

#### *Magma reservoir pressure estimation*

The value of 100 MPa was employed as a magma storage pressure in some of the calculations made (e.g. Waters and Lange thermometer and volatile solubility from Zhang et al., 2007, see below). The value was estimated using the calculations of Papale et al., 2006 for volatile saturation pressures for the melt inclusions with the highest CO<sub>2</sub> and H<sub>2</sub>O contents from FTIR data (Table DR5), which gave values of 80–90 MPa. This result can be considered a minimum estimate given that the system was likely under-saturated. An upper constraint can be gained by examining phase relations from experimental studies on systems that have similar compositions (e.g. Rader and Larsen, 2013). At 1000 °C, amphibole forms under pressures >120 MPa. Moreover, therefore the lack of abundant amphibole found in the Kelud 2014 pumice suggests that the magmas were stored at lower pressures than 120 MPa. The estimate of 100 MPa equates to a magma storage depth of ~4 km (using an approximate lithostatic pressure gradient of 25 MPa km<sup>-1</sup>). This depth concurs with clusters of earthquakes located at 3–4 km under Kelud in the weeks leading up to the 2014 eruption (Global Volcanism Program report). We therefore consider 100 MPa a first order estimate for the Kelud magmatic system until better constraints become available.

#### *Diffusion of H<sub>2</sub>O*

H<sub>2</sub>O diffusion is driven by gradients in H<sub>2</sub>O activity rather than in H<sub>2</sub>O concentration (Qin et al., 1992). This is because the difference between the pressure within an inclusion and external pressure is estimated to be small (Burnham, 1979). To this end, activities for melt inclusion and carrier liquid compositions (assumed to be the matrix glass composition) were calculated to estimate the potential H<sub>2</sub>O activity gradient. The activity gradient between the melt inclusions and carrier melt was calculated at -0.07, which is comparable with the low values of ~0.04 that Hartley et al. (2015) argued may have been too small to promote H<sup>+</sup> diffusion through olivine host crystals (Hartley et al. 2015). Indeed, Gaetani et al., (2012) stated that “low-H<sub>2</sub>O melt inclusions have the capacity to preserve a reliable record of H<sub>2</sub>O and CO<sub>2</sub> in the melt at the time of entrapment” as they are not significantly affected by diffusive reequilibration.

In the case that a H<sub>2</sub>O activity gradient of -0.07 was sufficient to drive reequilibration between the H<sub>2</sub>O in the carrier melt and trapped in melt inclusions, approximate timescales for this process have been estimated assuming that diffusion can occur at very low activity gradients. A melt inclusion reequilibration model based on the model of Bucholz et al. (2013), which calculates the analytical solution for symmetrical H<sup>+</sup> diffusion through a spherical host crystal with a spherical inclusion at its center (Qin et al., 1992).. A range of different conditions were used based on the crystal host size, melt inclusion diameter and temperature. Initial and final H<sub>2</sub>O contents were taken from the analyses made in this study (Table DR4). This was done so that we could explore the full range of timescales estimated for the exact conditions appropriate for this study.

Diffusion timescales were calculated using hydrogen diffusivities calculated from Johnson et al. (2013) and two different partition coefficients for hydrogen in plagioclase: 0.004 from Johnson, (2005) and 0.01 from Hamada et al. (2011). This provided a large range of diffusion timescales from a week to several months (Table DR3) for the reequilibration of H<sub>2</sub>O with the carrier liquid. This may explain why H<sub>2</sub>O contents in the melt inclusions were preserved whilst in storage. As the H<sub>2</sub>O content of the carrier melt fluctuated between relatively H<sub>2</sub>O -rich and H<sub>2</sub>O -poor states, the melt inclusions may not have had enough time to reequilibrate with the external conditions before they changed again. As H<sub>2</sub>O contents are unaffected by MI size, crystal size and distance from rim (i.e. diffusion effects; fig. DR3), these calculations may thus go some way to explaining why these H<sub>2</sub>O contents may be preserved, suggesting that either diffusion was too slow in this instance (weeks to months) or the activity gradient was too small to allow diffusion to take place in the first place.

*Temperature driven solubility changes affecting H<sub>2</sub>O contents*

Heating also reduces the solubility of dissolved H<sub>2</sub>O in the melt, which could lead to H<sub>2</sub>O exsolution (Ruprecht and Bachman, 2010). However, solubility calculations made from equations in Zhang et al., (2007) for rhyolites, show that even the largest temperature fluctuation observed (80 °C) at 100 MPa (estimated from volatile saturation pressures, see appendix) causes only a minor reduction in H<sub>2</sub>O solubility (0.15%). For this reason magma H<sub>2</sub>O content reduction via dilution with a H<sub>2</sub>O -poor magma recharge is more likely.

*Crystallinity calculations*

Phenocryst content and crystal aspect ratio was calculated using 20 photomicrographs of thin sections for both the 2007 dome rock and the 2014 pumice. The images were scaled and thresholded in ImageJ, and measurements of crystal aspect ratio and phenocryst content were averaged from >1000 crystals. This was corrected for porosity (calculated with image analysis of multiple BSE images, 45% in 2014 pumice and 10% in 2007 dome rock) to achieve a pore-free phenocryst content, to attempt to emulate the crystallinity in the magma reservoir, before microlite crystallization upon ascent. The phenocryst content of 2014 pumice ranges from 53-75% (mean: 59%) and crystal aspect ratio of 1.88, whereas the crystallinity for the 2007 dome products ranges from 43-63% (mean, 53%) and a crystal aspect ratio of 1.86. However the 2007 crystallinity in particular must be considered as maximum considering the potential for further phenocryst growth upon slow ascent and cooling during dome emplacement near the surface, which would not have affected the 2014 magma phenocryst content to the same extent. The lower crystallinity of the 2007 magma is likely a consequence of the higher temperatures estimated for the 2007 magma in comparison to the 2014 magma. This also means that bulk viscosity of the 2007 magmas was likely significantly lower than that of the 2014 magma. These crystallinity measurements for the 2014 erupted pumice were used in Fig. 3 to estimate the impact these could have on the bulk viscosity. A constant crystallinity was used for simplicity in Fig. 3, if changing crystallinity is taken into account, however, this would only accentuate the rheological fluctuations observed in Fig 3, since colder temperatures will yield higher crystal contents and vice-versa.

*References for appendix*

Bucholz, C. E., Gaetani, G. A., Behn, M. D. & Shimizu, N. (2013). Post-entrapment modification of volatiles and oxygen fugacity in olivine-hosted melt inclusions. *Earth and Planetary Science Letters*. Elsevier 374, 145–155.

Johnson, E. A. & Rossman, G. R. (2013). The diffusion behavior of hydrogen in plagioclase feldspar at 800–1000°C: Implications for re-equilibration of hydroxyl in volcanic phenocrysts. *American Mineralogist* 98, 1779–1787.

Johnson, E. A. (2005) Magmatic water contents recorded by hydroxyl concentrations in plagioclase phenocrysts from Mount St. Helens, 1980-1981. *Geochimica et Cosmochimica Acta*, 69(10s), A743.

Rader, E. L., and Larsen, J. F., 2013, Experimental phase relations of a low MgO Aleutian basaltic andesite at  $X_{H_2O}=0.7-1$ : Contributions to Mineralogy and Petrology, v. 166, no. 6, p. 1593-1611.

Papale P, Moretti R, Barbato D (2006) The compositional dependence of the saturation surface of  $H_2O + CO_2$  fluids in silicate melts. *Chemical Geology* 229, 78-95.

Zhang, Y. X., Xu, Z. J., Zhu, M. F., and Wang, H. Y., 2007, Silicate melt properties and volcanic eruptions: Reviews of Geophysics, v. 45, no. 4.

Global Volcanism Program, 2013. Kelut (263280) in *Volcanoes of the World*, v. 4.5.0. Venzke, E (ed.). Smithsonian Institution. Downloaded 01 Oct 2015 (<http://volcano.si.edu/volcano.cfm?vn=263280>).  
<http://dx.doi.org/10.5479/si.GVP.VOTW4-2013>

## Raman calibration with FTIR standards

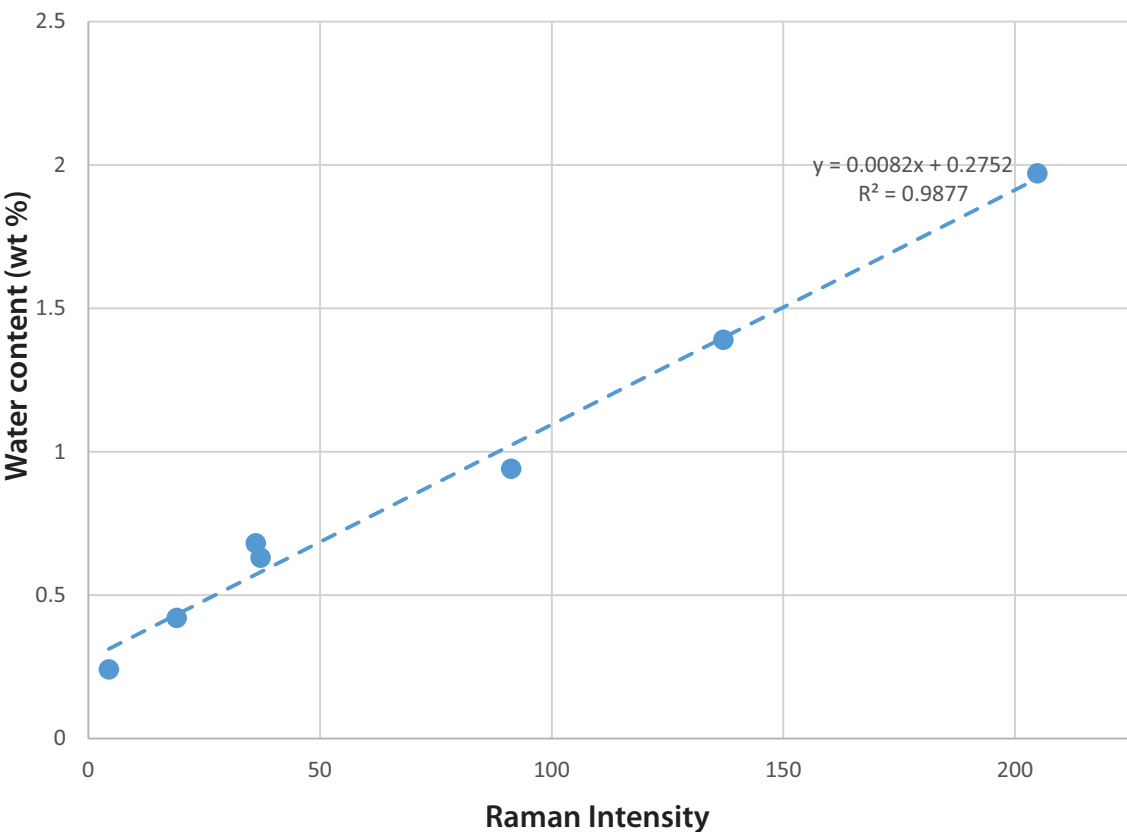

**Fig. DR1.** Dacitic glasses of known water contents (measured via FTIR), were measured with Raman spectroscopy (repeated ~5 times and averaged, Table DR1). Two Kelud melt inclusions were also measured both with Raman and FTIR (the two central points on the graph), providing calibration for the exact composition. The calculated intensities show a good fit ( $R^2 = 0.99$ ) and thus were used to produce a calibration curve.

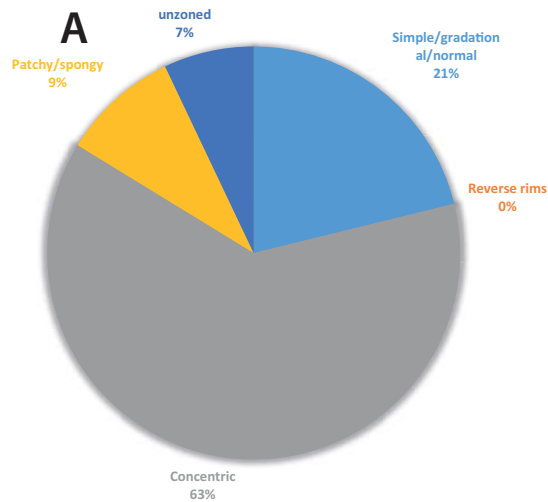

| Type of zoning | Number     |
|----------------|------------|
| Simple/normal  | 69         |
| Reverse rims   | 0          |
| Concentric     | 204        |
| Patchy/spongy  | 30         |
| unzoned        | 23         |
| <b>Total</b>   | <b>326</b> |

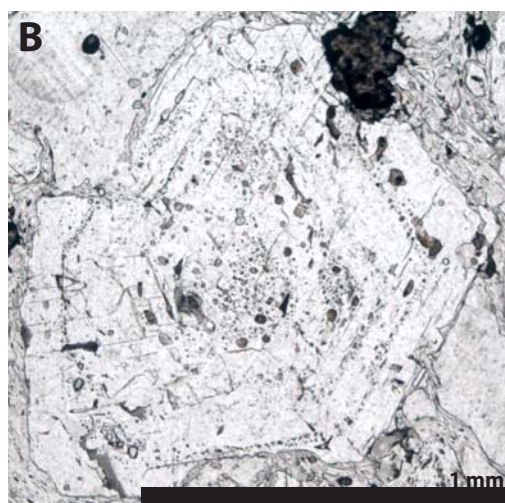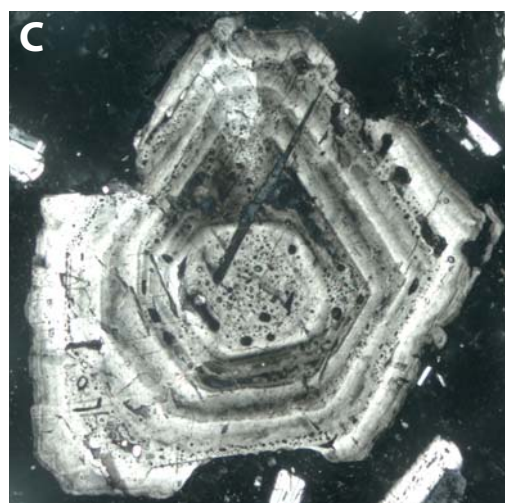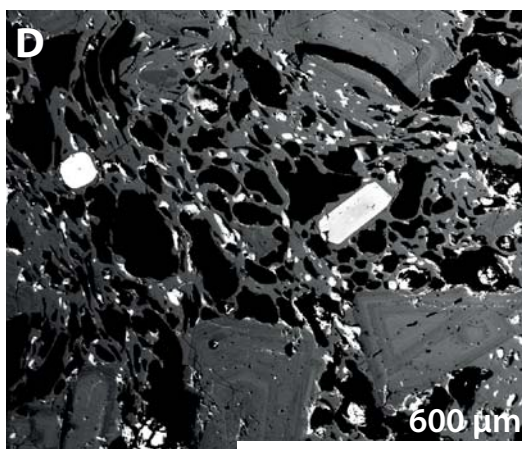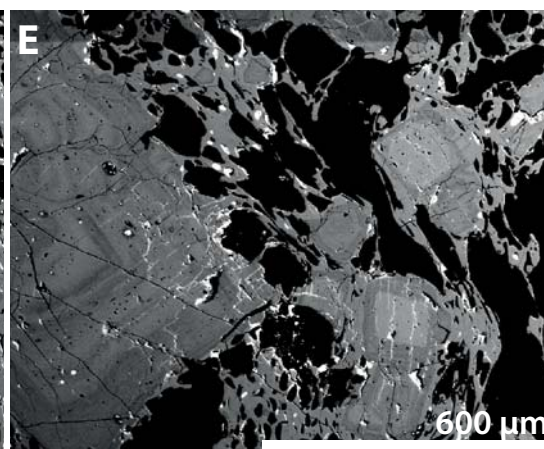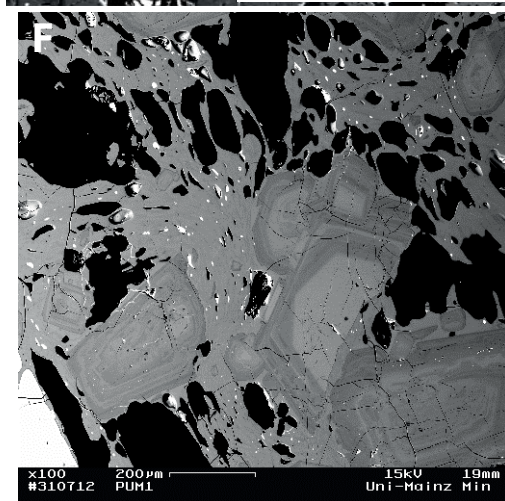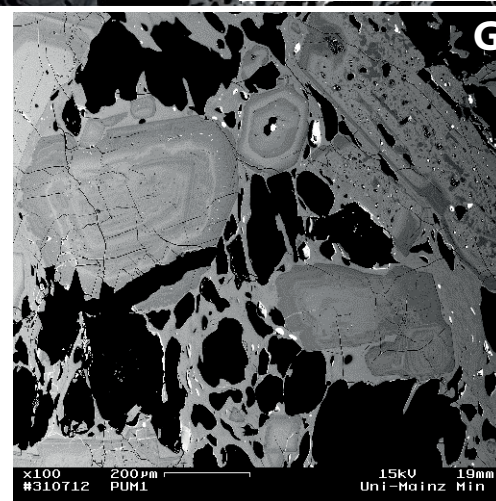

**Figure DR2.** A) Pie chart and point counting table showing the abundance of different zoning types. Concentric zoning is the most abundant, with normal zoning, patchy zoning, unzoned plagioclases also present. B) a plane-polarized and C) cross-polarized microscope image showing an example of a concentrically zoned plagioclase. The plagioclase shows melt inclusions entrapped within the different zoned layers. D to G) Representative backscattered SEM images showing the types of plagioclase zoning observed in the 2014 pumice. D) showing dominantly concentric zoning, E) concentric, unzoned and normal zoning, F) normal and concentric and G) concentric and patchy zoning. The groundmass glass can also be seen showing little microlite crystallisation.



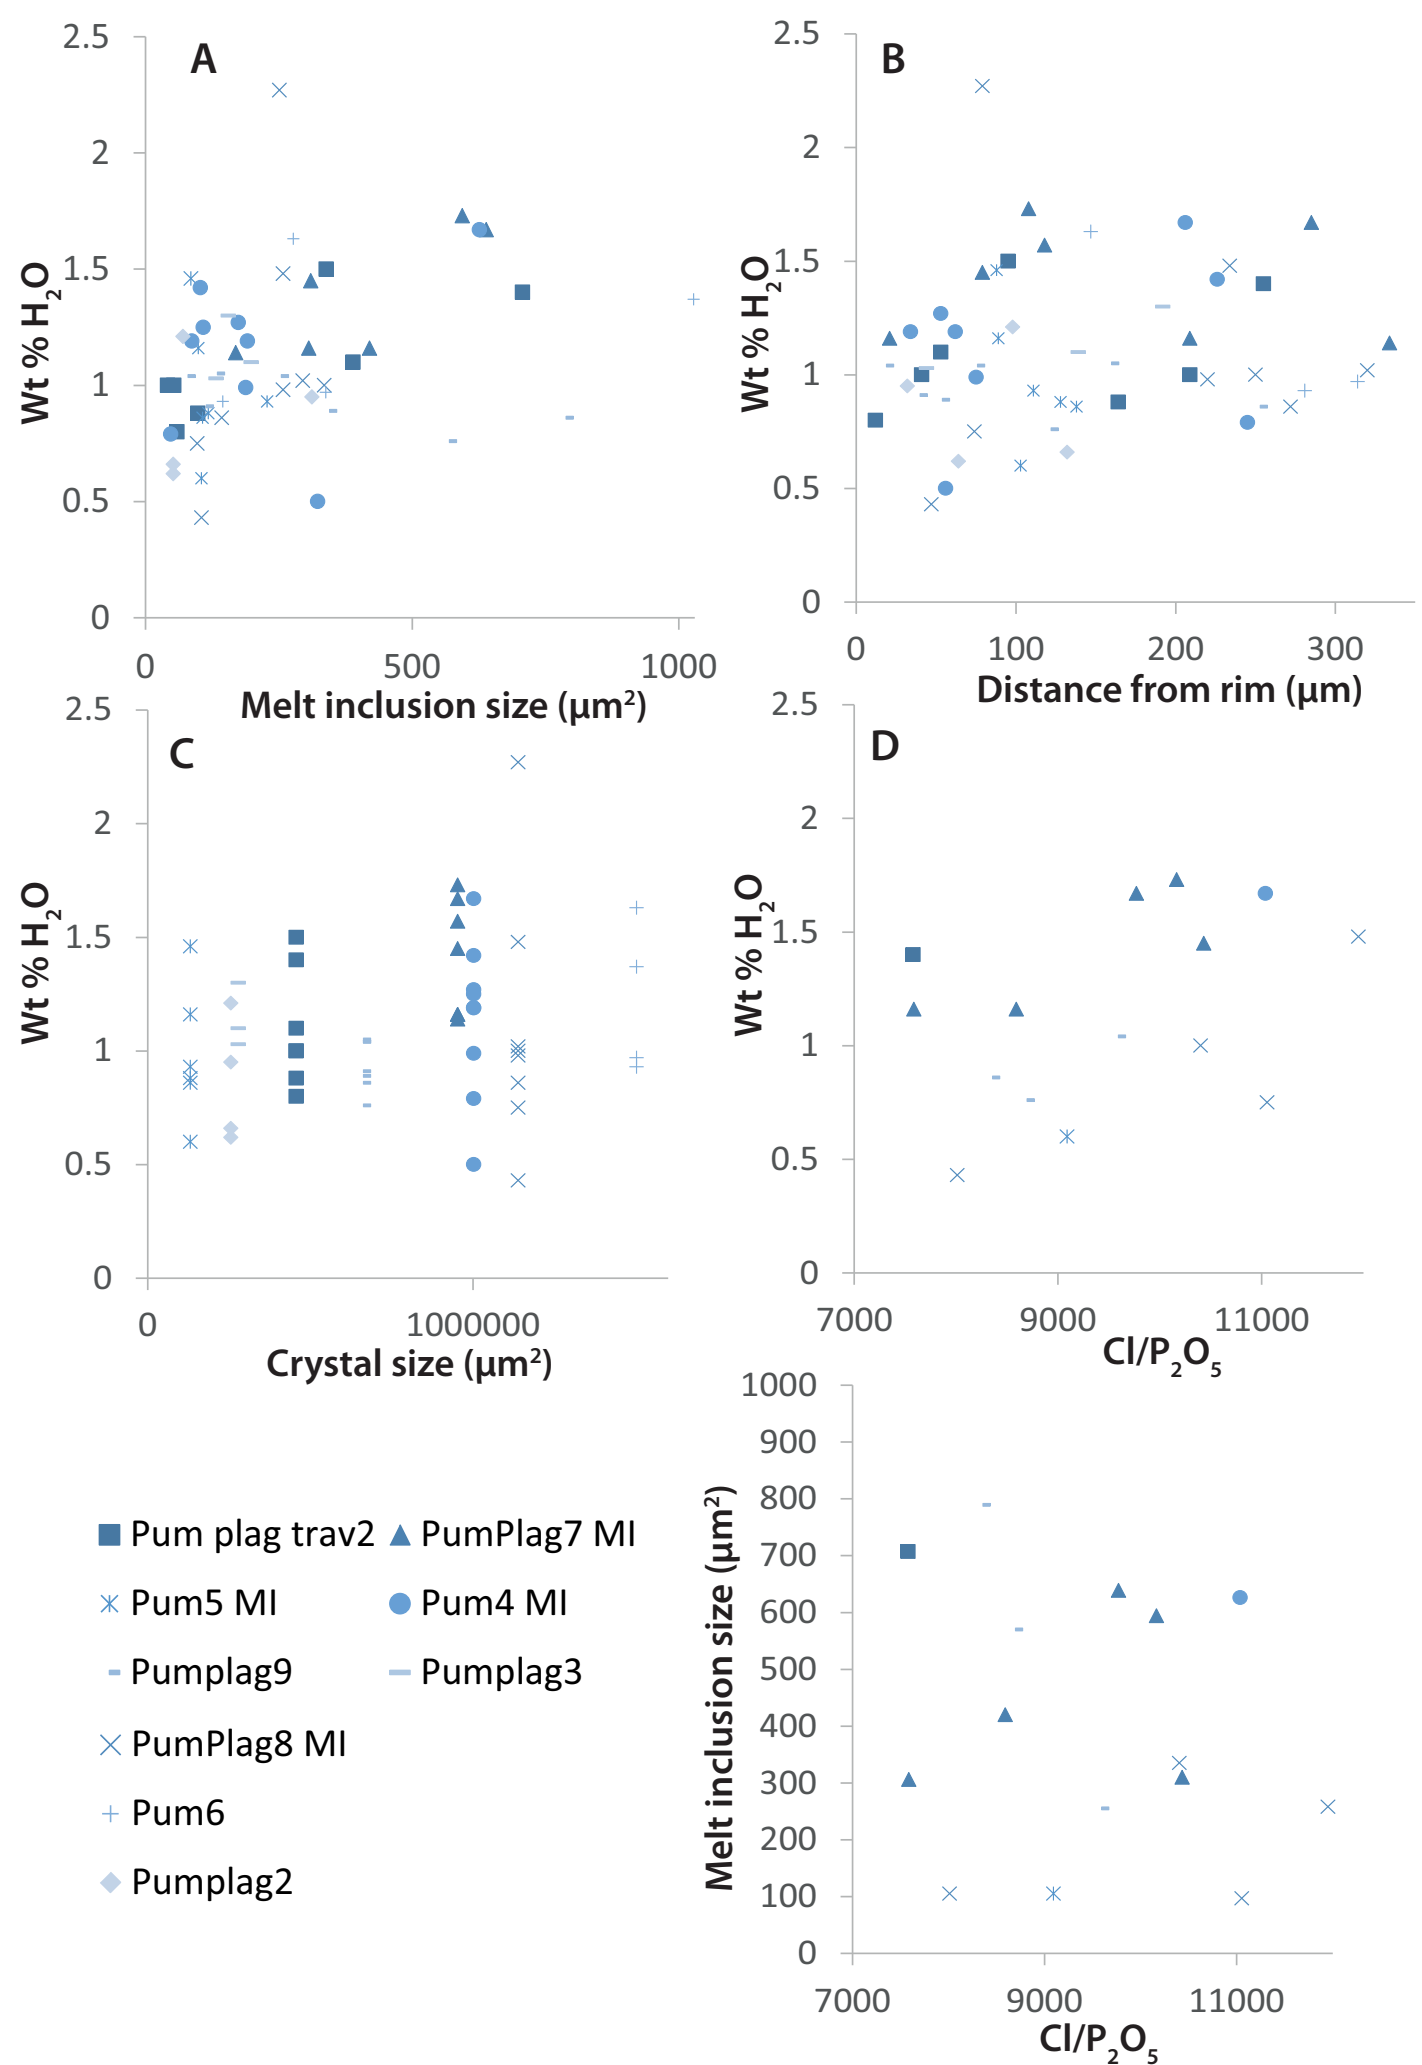

**Fig. DR3.** Plots of water content via Raman spectroscopy against A) melt inclusion area, B) distance from the rim, C) crystal size and D) Cl/P<sub>2</sub>O<sub>5</sub>, a proxy for boundary layer effects (Baker, 2008). No significant correlations between these variables are observed (n=54, all P values >0.01 for 9 different crystals). This dataset also includes crystals which did not show concentric zoning.



Plag 8

Plag 4

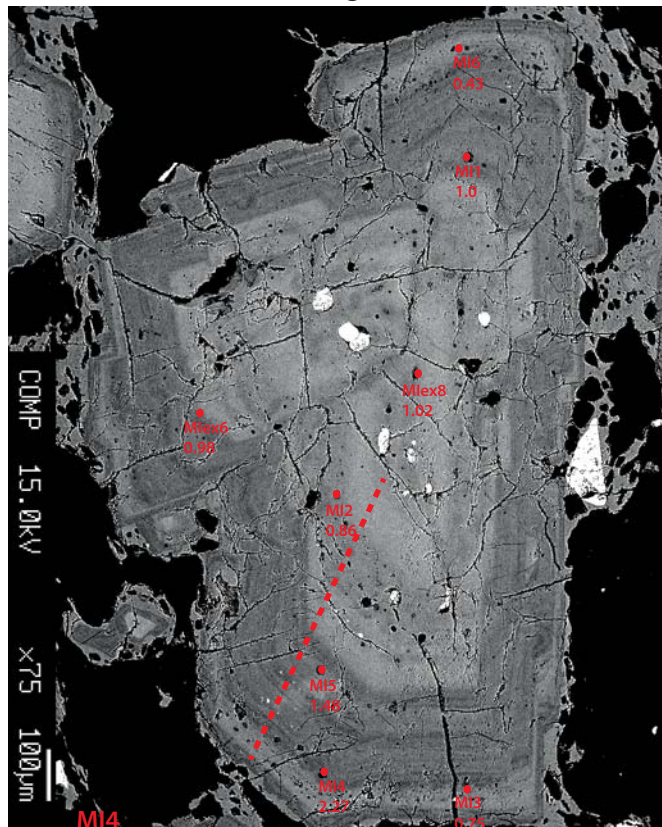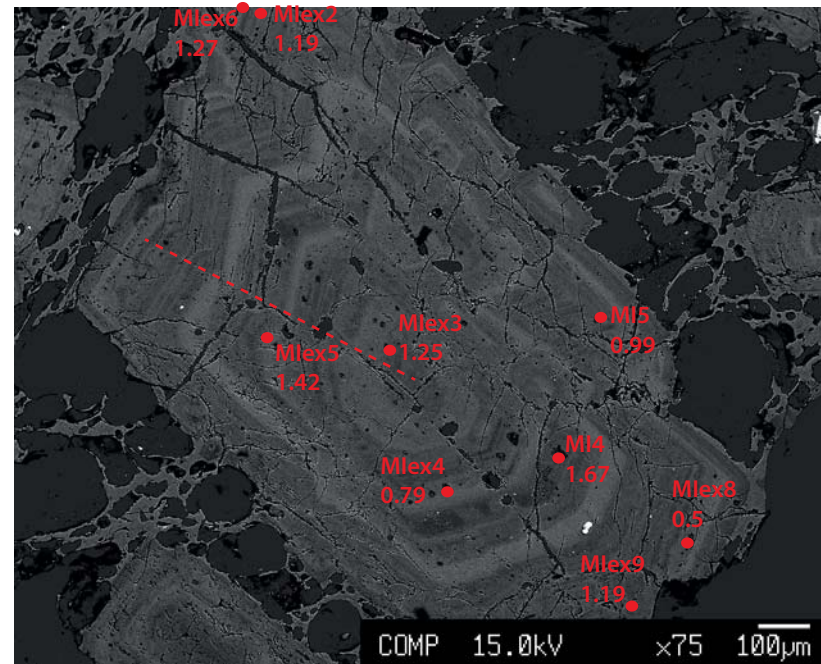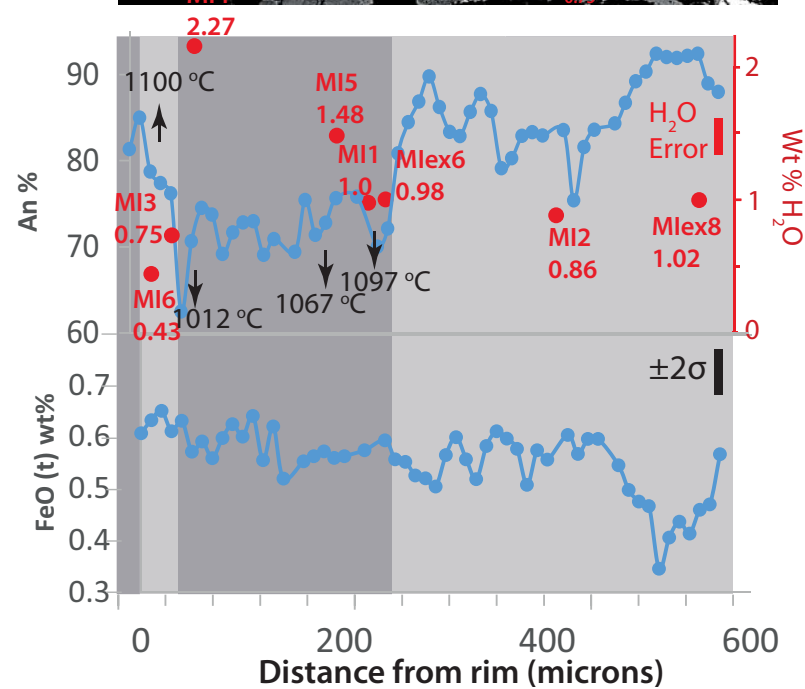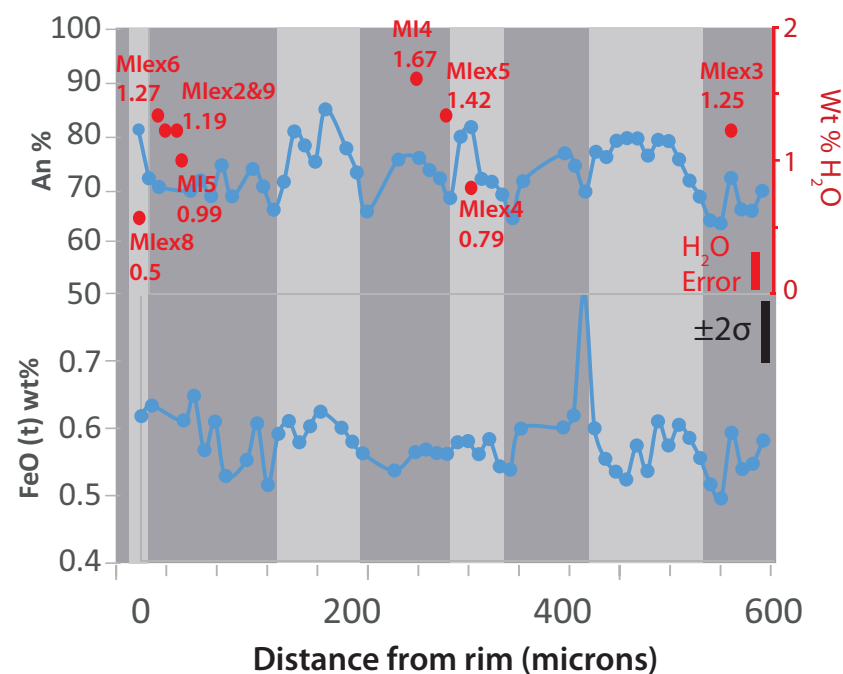

**Figure DR4.** Concentrically zoned plagioclase feldspars as displayed like figure 1 in the manuscript, with upper panel displaying the backscattered SEM image of the feldspar with the melt inclusions measured with Raman spectroscopy and the location of the plagioclase traverses. The lower plots show the plagioclase anorthite and FeO chemical profile and the secondary Y axis shows the water contents throughout the crystal as measured by Raman on melt inclusions. Temperatures, where given are calculated from Waters and Lange 2015, from plagioclase, melt inclusion compositions and water contents.

Plag 2

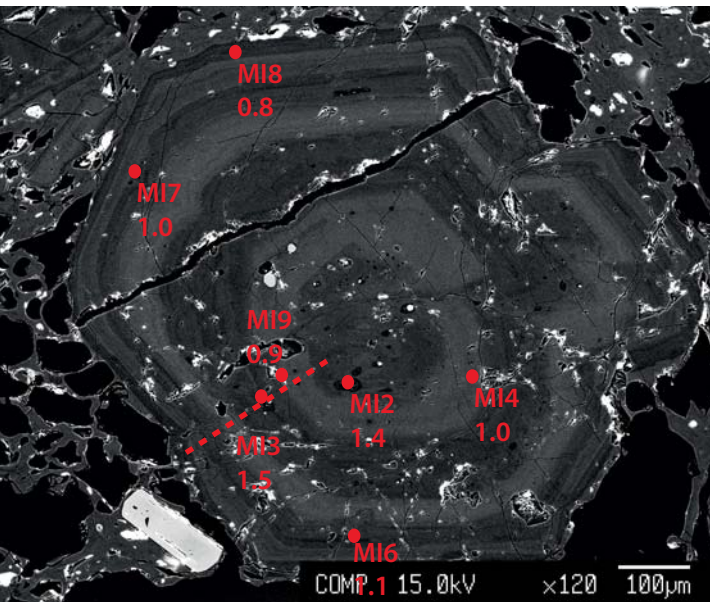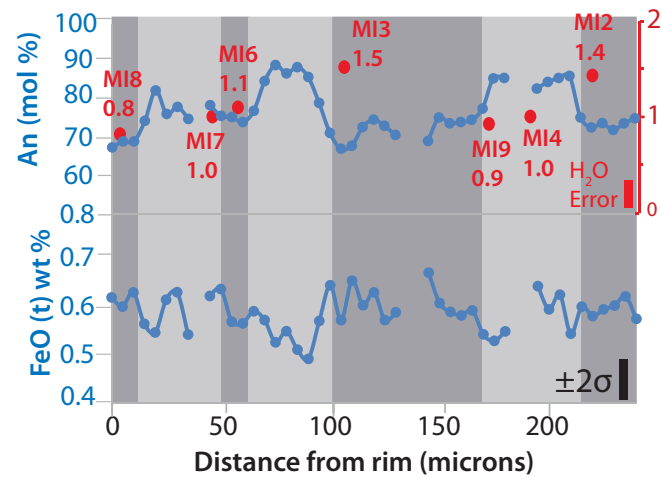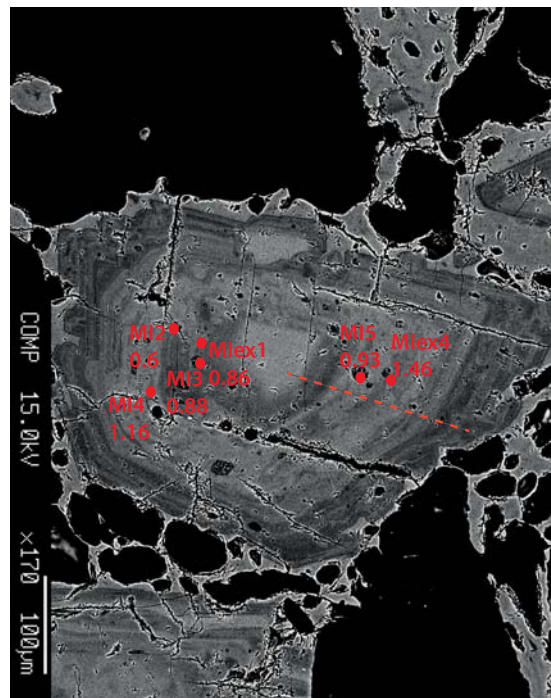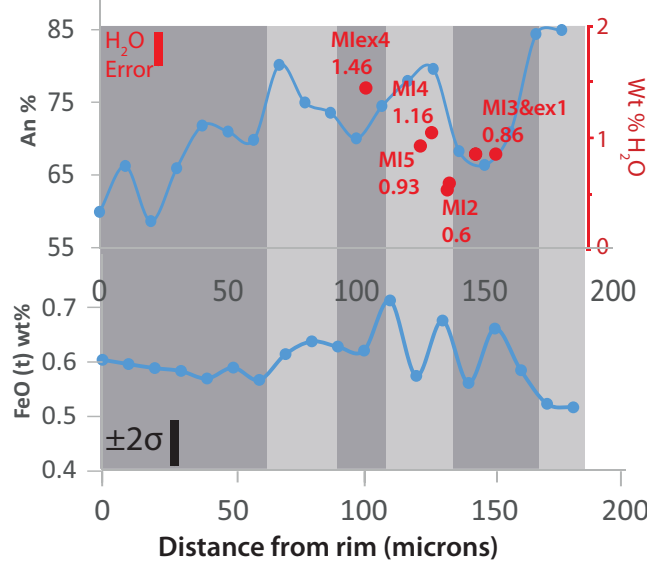

Plag 6

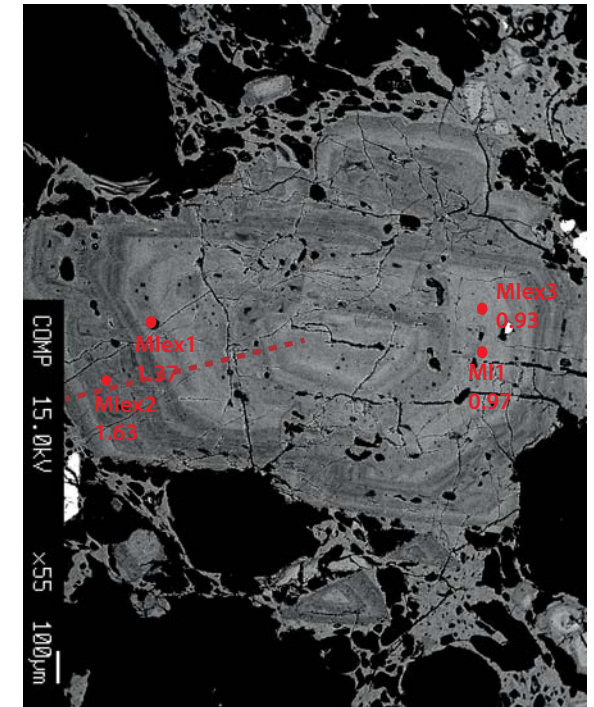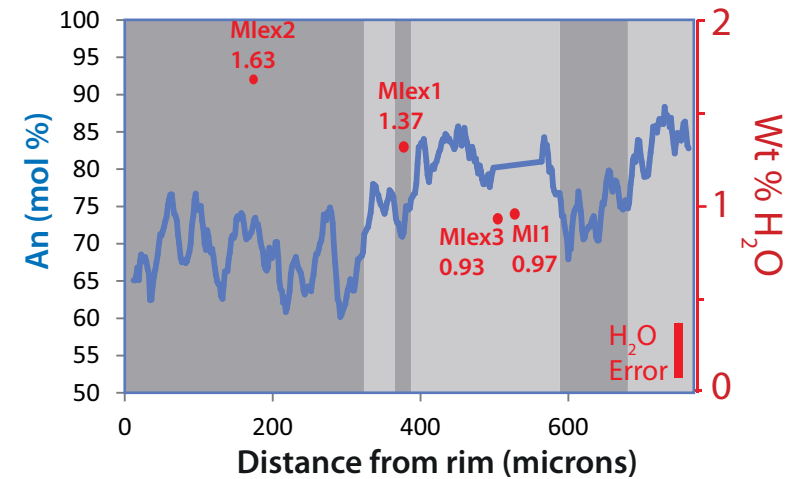

Calibrated greyscale anorthite profile

**Figure DR5.** Concentrically zoned plagioclase feldspars as displayed like figure 1 in manuscript, with upper panel displaying the backscattered SEM image of the feldspar with the melt inclusions measured with Raman spectroscopy and the location of the plagioclase traverse. The lower plots show the plagioclase anorthite and FeO chemical profile and the secondary Y axis shows the water contents throughout the crystal as measured by Raman on melt inclusions. Plag 6 is calculated using the strong correlation of anorthite to greyscale, which calibrated using point data of the crystal.

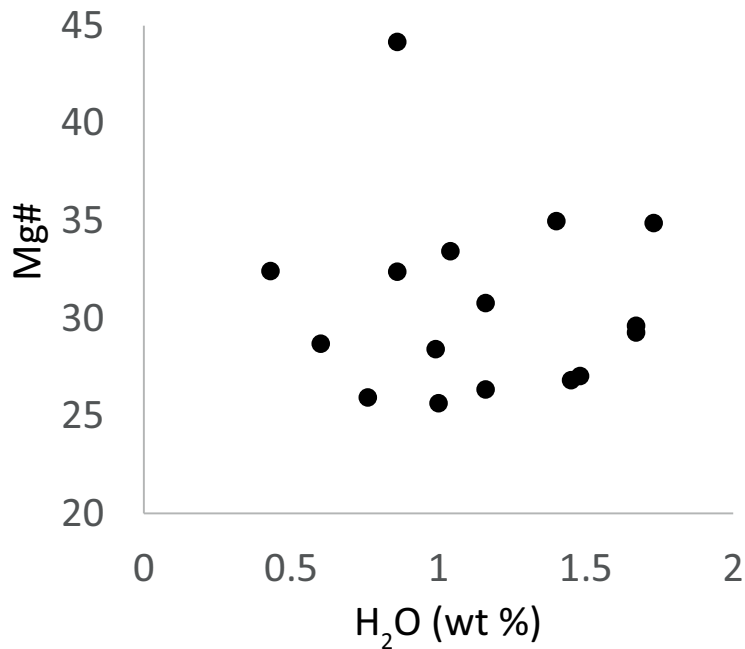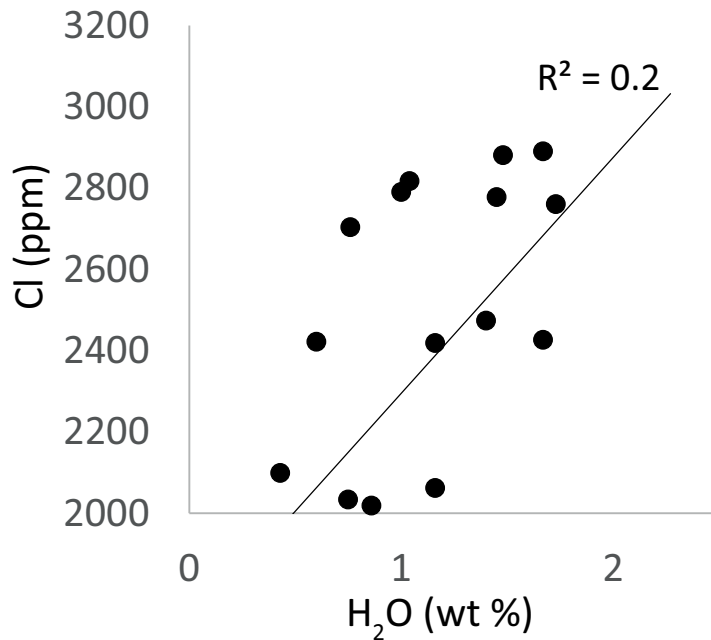

Fig DR6. a) No significant relationship exists between Mg# and H<sub>2</sub>O ( $p$  value= 0.53) implying that magma reservoirs are recharged by melts of a similar composition. b) When H<sub>2</sub>O is plotted against Cl (another incompatible element, there is a weak, but positive correlation ( $R^2= 0.2$ ,  $p$  value= 0.07). This supports the notion that the observed water trends measured in the melt inclusions are illustrative of volatile dilution and enrichment within the magma reservoir.

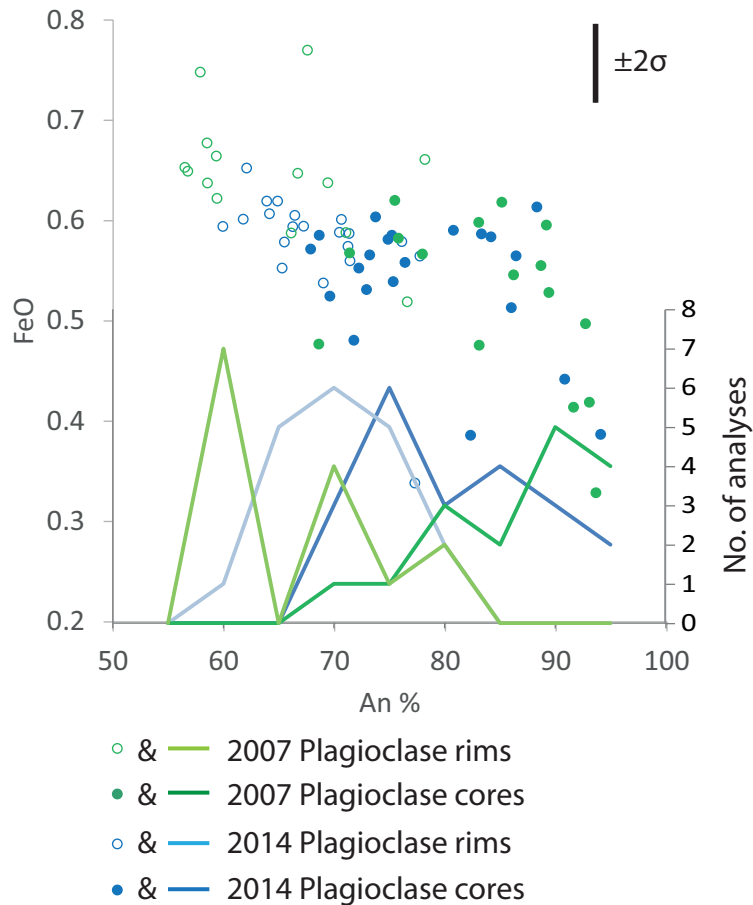

Figure DR7. Scatter plot of plagioclase phenocryst cores and rims from 2007 effusive eruption and 2014 explosive eruption. The lines show a histogram plot for molar anorthite for the same fields plotted on the right axis.



Fig 3A in Waters and Lange, 2015

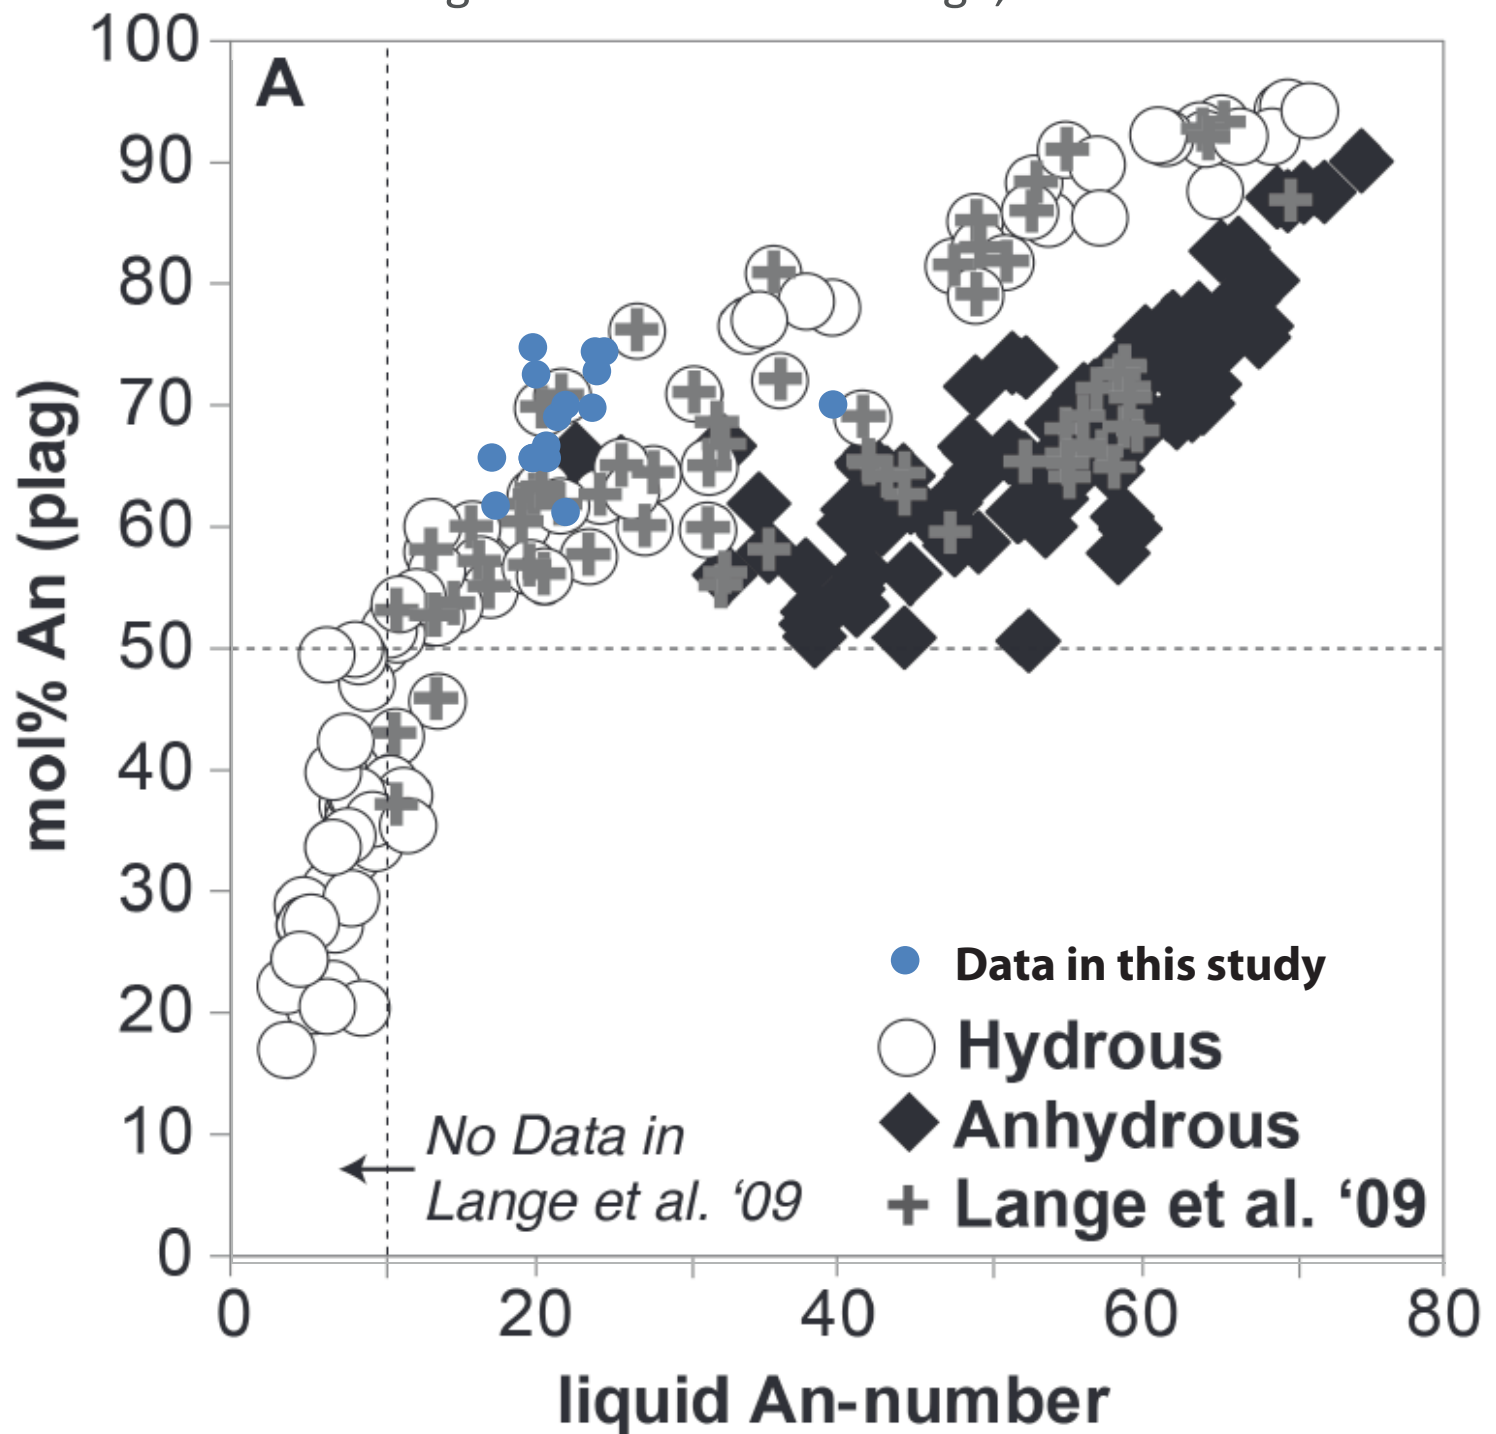

**Figure DR8.** Plot from Waters and Lange 2015 of liquid anorthite number versus molar anorthite to assess equilibrium of measured melt and plagioclase compositions. Those points far outside the experimental dataset in the paper were discarded as being xenocrystic or not in equilibrium with the carrier melt and thus not used for the plagioclase thermometry.

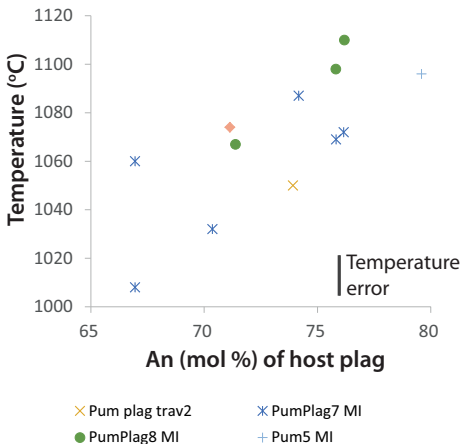

**Fig. DR9.** Temperature estimates from plagioclase-liquid thermometry (Waters and Lange, 2015) using plagioclase and melt inclusion compositions (where measured), and measured water contents. These temperatures are plotted against anorthite of the host plagioclase. Also plotted are the crystals from where the MI are hosted.

Table DR1. Samples with known water contents measured with Raman spectroscopy multiple times

| Samples        | Repetitions of runs with Raman Spectroscopy intensities |        |        |        |        |         |        |               |                            |
|----------------|---------------------------------------------------------|--------|--------|--------|--------|---------|--------|---------------|----------------------------|
|                | 1                                                       | 2      | 3      | 4      | 5      | Average | st dev | Stdev convert | Standard error of the mean |
| GC101          | 35.12                                                   | 34.74  | 32.51  | 42.47  |        | 36.21   | 3.75   | 0.31          | 0.15                       |
| SD401          | 17.83                                                   | 19.47  | 17.58  | 21.74  |        | 19.15   | 1.66   | 0.29          | 0.14                       |
| OD201          | 201.02                                                  | 233.90 | 190.44 | 231.57 | 167.44 | 204.87  | 25.22  | 0.48          | 0.22                       |
| SD301          | 31.30                                                   | 59.64  | 25.05  | 21.71  | 48.49  | 37.24   | 14.51  | 0.39          | 0.18                       |
| Andglass_axial | 4.19                                                    | 4.73   | 4.49   | 4.47   |        | 4.47    | 0.19   | 0.28          | 0.14                       |
| Average SE     |                                                         |        |        |        |        |         |        |               | 0.17                       |

Data for Fig. DR3 Raman calibration plot

| Average Raman in Water conc from FTIR |           |      |
|---------------------------------------|-----------|------|
| GC101                                 | 36.20955  | 0.68 |
| SD401                                 | 19.154125 | 0.42 |
| OD201                                 | 204.8721  | 1.97 |
| SD301                                 | 37.23918  | 0.63 |
| Andglass_axial                        | 4.46965   | 0.24 |
| FTIRPlagMI20                          | 137.0848  | 1.39 |
| FTIRPlagMI21b                         | 91.2876   | 0.94 |



Table DR2 Major element data from EMPA for melt inclusions and matrix glass from the 2014 eruption products

Melt Inclusions

| Na2O | SiO2  | CaO  | FeO    | P2O5   | F      | MgO    | K2O    | MnO    | Cl     | Al2O3 | SO3    | TiO2   | Total |
|------|-------|------|--------|--------|--------|--------|--------|--------|--------|-------|--------|--------|-------|
| 4.33 | 68.24 | 3.35 | 2.47   | 0.2232 | 0.0541 | 0.2072 | 1.61   | 0.0867 | 0.1797 | 15.94 | 0.0898 | 0.4663 | 97.2  |
| 4.28 | 68.17 | 2.68 | 2.65   | 0.3243 | 0.0801 | 0.4344 | 1.85   | 0.1003 | 0.1805 | 15.83 | 0.0434 | 0.5163 | 97.1  |
| 3.96 | 70.53 | 2.23 | 1.2814 | 0.0776 | 0.1776 | 0.2    | 1.99   | 0.0721 | 0.2152 | 15    | 0.0081 | 0.5093 | 96.3  |
| 3.94 | 70.21 | 2.36 | 1.37   | 0.0636 | 0.0736 | 0.2064 | 1.88   | 0.1313 | 0.2238 | 15.44 | 0.0192 | 0.4807 | 96.4  |
| 4.36 | 67.22 | 2.5  | 3.35   | 0.1784 | 0      | 0.5102 | 1.88   | 0.1224 | 0.1905 | 15.38 | 0.0421 | 0.6187 | 96.4  |
| 4.45 | 67.45 | 2.81 | 1.87   | 0.2324 | 0      | 0.3315 | 1.72   | 0.067  | 0.205  | 16.47 | 0.0744 | 0.6044 | 96.3  |
| 4.18 | 67.71 | 2.5  | 2.8    | 0.2115 | 0.035  | 0.3958 | 1.82   | 0.1218 | 0.2032 | 15.72 | 0.0512 | 0.5694 | 96.3  |
| 3.95 | 67.58 | 2.7  | 3.35   | 0.1042 | 0.1369 | 0.5533 | 1.71   | 0.154  | 0.181  | 15.07 | 0.0665 | 0.3885 | 95.9  |
| 2.04 | 69.53 | 2.81 | 2.43   | 0.2    | 0      | 0.5649 | 1.6    | 0.1242 | 0.1784 | 15.62 | 0.0293 | 0.5435 | 95.7  |
| 3.38 | 66.26 | 2.53 | 4.51   | 0.1149 | 0      | 1.2962 | 2.55   | 0.1952 | 0.3    | 13.52 | 0.0291 | 0.3939 | 95.1  |
| 3.49 | 65.98 | 2.86 | 4.39   | 0.1534 | 0      | 1.1229 | 2.36   | 0.2554 | 0.2816 | 13.72 | 0.0253 | 0.4689 | 95.1  |
| 3.54 | 65.81 | 2.73 | 4.03   | 0.237  | 0.0178 | 1.1058 | 2.21   | 0.1775 | 0.2863 | 14.29 | 0.0753 | 0.5897 | 95.1  |
| 3.34 | 69    | 2.87 | 4.33   | 0.2642 | 0      | 0.9015 | 1.87   | 0.1777 | 0.2177 | 12.42 | 0.0158 | 0.652  | 96.1  |
| 2.21 | 68.72 | 3.33 | 4.46   | 0.2464 | 0      | 1.2035 | 1.69   | 0.2322 | 0.2142 | 13.62 | 0.0481 | 0.6055 | 96.6  |
| 4.34 | 66.13 | 3.31 | 3.79   | 0.2199 | 0.1165 | 0.8942 | 1.82   | 0.1588 | 0.2427 | 14.78 | 0.0383 | 0.5026 | 96.4  |
| 5.36 | 61.2  | 6.32 | 3.07   | 0.162  | <0.098 | 0.6836 | 1.0637 | 0.0668 | 0.1016 | 19.02 | 0.0461 | 0.427  | 97.5  |
| 4.16 | 66.63 | 2.68 | 4.97   | 0.2716 | <0.108 | 1.4927 | 2.33   | 0.2019 | 0.2761 | 13.83 | 0.0398 | 0.5931 | 97.5  |
| 4.27 | 66.8  | 2.86 | 3.71   | 0.2663 | <0.103 | 0.763  | 2.04   | 0.1416 | 0.2778 | 14.04 | 0.0358 | 0.6038 | 95.8  |
| 3.66 | 65.88 | 2.78 | 4.43   | 0.2959 | <0.108 | 1.0279 | 2.07   | 0.1931 | 0.2891 | 13.48 | <0.036 | 0.6845 | 94.8  |
| 4.73 | 67.25 | 3.68 | 4.64   | 0.2718 | 0.1352 | 1.1571 | 1.47   | 0.1111 | 0.2062 | 13.94 | 0.0492 | 0.5978 | 98.2  |
| 3.97 | 66.11 | 2.97 | 3.34   | 0.2411 | <0.112 | 0.6944 | 1.96   | 0.16   | 0.2881 | 13.75 | 0.0396 | 0.6895 | 94.2  |
| 4.49 | 66.87 | 2.16 | 4.3    | 0.184  | <0.106 | 0.0531 | 2.6    | <0.052 | 0.2034 | 14.47 | <0.033 | 0.4987 | 95.9  |
| 4.63 | 58.8  | 6.86 | 4.21   | 0.2168 | 0.1377 | 1.1311 | 1.65   | 0.1404 | 0.1587 | 19.69 | 0.0385 | 0.511  | 98.2  |
| 3.86 | 66.09 | 3.38 | 4.28   | 0.2683 | <0.097 | 0.8282 | 1.9    | 0.1886 | 0.2791 | 13.74 | 0.0496 | 0.6765 | 95.6  |
| 3.79 | 68.91 | 2.58 | 3.2    | 0.2664 | <0.097 | 0.7225 | 2.08   | 0.1233 | 0.2422 | 12.75 | 0.0517 | 0.6628 | 95.4  |
| 3.19 | 64.32 | 2.02 | 6.29   | 0.2415 | 0.1737 | 2.79   | 2.79   | 0.1335 | 0.2019 | 12.16 | 0.0514 | 0.5926 | 95.0  |
| 3.95 | 66.64 | 2.81 | 3.75   | 0.3109 | <0.104 | 0.7367 | 2.06   | 0.2008 | 0.2704 | 13.34 | 0.0358 | 0.6826 | 94.8  |
| 4.25 | 65.75 | 2.69 | 4.22   | 0.3265 | <0.101 | 1.2735 | 2.25   | 0.164  | 0.2474 | 14.05 | 0.0412 | 0.6418 | 95.9  |
| 5.02 | 68.66 | 3.95 | 3.39   | 0.1877 | <0.108 | 0.6182 | 1.39   | 0.1149 | 0.1476 | 15.53 | <0.035 | 0.4928 | 99.5  |
| 4.18 | 65.74 | 2.89 | 4.38   | 0.1469 | <0.104 | 1.2724 | 2.01   | 0.1587 | 0.2438 | 14.06 | 0.0673 | 0.5369 | 95.7  |
| 3.04 | 67.85 | 3.13 | 4.35   | 0.2816 | <0.106 | 0.8726 | 1.5    | 0.2077 | 0.2419 | 12.43 | <0.037 | 0.6745 | 94.6  |

|              |       |      |      |        |        |        |      |        |        |       |        |        |       |
|--------------|-------|------|------|--------|--------|--------|------|--------|--------|-------|--------|--------|-------|
| 4.3          | 64.72 | 3.02 | 4.38 | 0.262  | <0.101 | 1.1783 | 2.02 | 0.1949 | 0.2099 | 14.62 | 0.0399 | 0.5311 | 95.5  |
| MATRIX GLASS |       |      |      |        |        |        |      |        |        |       |        |        |       |
| 4.42         | 69.73 | 3.61 | 3.91 | 0.2266 | 0.0742 | 1.0624 | 1.68 | 0.1806 | 0.1452 | 15.39 | 0.0068 | 0.5891 | 101.0 |
| 4.14         | 69.59 | 3.56 | 3.85 | 0.195  | 0      | 1.0094 | 1.83 | 0.2022 | 0.1313 | 15.48 | 0      | 0.513  | 100.5 |
| 4.3          | 69.52 | 3.61 | 4.22 | 0.1993 | 0      | 1.1318 | 1.75 | 0.1282 | 0.1283 | 15.71 | 0.0052 | 0.5685 | 101.3 |
| 4.29         | 69.35 | 3.68 | 4.29 | 0.1992 | 0.0121 | 1.1154 | 1.75 | 0.1446 | 0.1135 | 15.6  | 0.0077 | 0.5469 | 101.1 |
| 4.35         | 69.71 | 3.54 | 4.02 | 0.1758 | 0.0002 | 1.0875 | 1.68 | 0.1314 | 0.1159 | 15.68 | 0      | 0.5183 | 101.0 |
| 4.34         | 69.58 | 3.78 | 3.89 | 0.2186 | 0.0213 | 1.0466 | 1.63 | 0.1198 | 0.1297 | 15.76 | 0.0447 | 0.4715 | 101.0 |
| 4.42         | 69.35 | 3.5  | 4.04 | 0.2121 | 0.0322 | 1.0498 | 1.79 | 0.1797 | 0.13   | 15.55 | 0.0362 | 0.5324 | 100.8 |
| 4.21         | 69.23 | 3.37 | 3.87 | 0.1914 | 0.008  | 0.985  | 1.74 | 0.1248 | 0.1085 | 15.31 | 0.0388 | 0.5471 | 99.7  |
| 4.24         | 65.97 | 3.38 | 3.88 | 0.211  | 0      | 1.0007 | 1.62 | 0.157  | 0.1455 | 14.55 | 0      | 0.4999 | 95.7  |
| 4.38         | 70.03 | 3.61 | 4.03 | 0.204  | 0      | 1.0835 | 1.76 | 0.1858 | 0.1158 | 15.6  | 0.0071 | 0.4944 | 101.5 |
| 4.28         | 69.43 | 3.63 | 4.14 | 0.1954 | 0      | 1.0611 | 1.66 | 0.1983 | 0.1277 | 15.41 | 0.0254 | 0.5299 | 100.7 |
| 4.28         | 69.32 | 3.5  | 4.1  | 0.1702 | 0.0332 | 1.1212 | 1.67 | 0.1281 | 0.1324 | 15.49 | 0.0151 | 0.5843 | 100.5 |
| 4.41         | 69.7  | 3.66 | 4.02 | 0.197  | 0      | 1.063  | 1.73 | 0.1541 | 0.1252 | 15.73 | 0.0112 | 0.5189 | 101.3 |
| 4.24         | 69.37 | 3.57 | 4.03 | 0.1922 | 0.1757 | 1.0485 | 1.71 | 0.1791 | 0.1289 | 15.48 | 0      | 0.5134 | 100.6 |
| 4.45         | 69.54 | 3.51 | 3.92 | 0.2507 | 0.0135 | 0.9919 | 1.82 | 0.1579 | 0.0849 | 15.67 | 0      | 0.5566 | 101.0 |
| 4.24         | 69.55 | 3.46 | 3.82 | 0.1931 | 0.1654 | 1.0472 | 1.82 | 0.1024 | 0.1112 | 15.39 | 0.0446 | 0.5521 | 100.5 |
| 4.23         | 69.54 | 3.42 | 3.94 | 0.1534 | 0      | 1.0158 | 1.83 | 0.1749 | 0.1307 | 15.41 | 0.0039 | 0.5529 | 100.4 |
| 4.19         | 69.73 | 3.5  | 4.34 | 0.189  | 0      | 1.1104 | 1.68 | 0.1088 | 0.1737 | 14.58 | 0.0157 | 0.5937 | 100.2 |
| 3.52         | 70.01 | 3.42 | 3.72 |        |        | 0.7115 | 1.84 | 0.1577 |        | 15.22 |        | 0.45   | 99.0  |

*Table DR3. Diffusion timescales using the modified model from Bucholz et al 2013 using differing conditions. These conditions used were specifically recorded in this study (Table S4) and therefore not arbitrary. This was done so that we could explore the full range of timescales estimated for the exact conditions appropriate for this study. Two different published KD's (diffusivities) for hydrogen in plagioclase were also used.*

| <b>Inclusion size (dian</b> | <b>Crystal size</b> | <b>Temperature</b> | <b>H2O intital</b> | <b>H2O end</b> | <b>KD Hamada († KD Johnson (0.004)</b> |          |
|-----------------------------|---------------------|--------------------|--------------------|----------------|----------------------------------------|----------|
| 17.5                        | 489                 | 1000               | 1.14               | 1.45           | 9 days                                 | 20 days  |
| 17.5                        | 613                 | 1000               | 1.14               | 1.45           | 10 days                                | 20 days  |
| 17.5                        | 181                 | 1000               | 1.14               | 1.45           | 7 days                                 | 18 days  |
| 46                          | 421                 | 1000               | 1.14               | 1.45           | 49 days                                | 120 days |
| 46                          | 613                 | 1000               | 1.14               | 1.45           | 51 days                                | 123 days |
| 46                          | 181                 | 1000               | 1.14               | 1.45           | 44 days                                | 110 days |
| 46                          | 421                 | 1090               | 1.14               | 1.45           | 9 days                                 | 21 days  |
| 46                          | 421                 | 985                | 1.14               | 1.45           | 67 days                                | 164 days |
| 46                          | 421                 | 1000               | 1.14               | 1.91           | 55 days                                | 136 days |
| 17.5                        | 421                 | 1000               | 1.14               | 1.91           | 9 days                                 | 21 days  |
| 46                          | 613                 | 1000               | 1.14               | 1.91           | 57 days                                | 140 days |

*Table DR4. Raman data of water contents with information regarding the melt inclusion and crystal size and EMPA data*

| Concentric-zoned crystals |                               | EMPA data   |                |                |                   |               |               |            |      |       |        |      |       |       |       |      |        |       |       |       |       |            |
|---------------------------|-------------------------------|-------------|----------------|----------------|-------------------|---------------|---------------|------------|------|-------|--------|------|-------|-------|-------|------|--------|-------|-------|-------|-------|------------|
|                           |                               | H2O (Raman) | An of host pla | Fe of host pla | Crystal size (μm) | Modelled terr | Distance from | Size of MI | Na2O | SiO2  | K2O    | FeO  | P2O5  | FxOy  | MgO   | CaO  | MnO    | ClxOy | Al2O3 | SO3   | TiO2  | Mg# number |
| Pum plag trav2            | Pumplag2 MI1                  | 1.4         | 73.9           | 0.62           | 456406            | 1050.00       | 255           | 707        | 4.25 | 65.75 | 2.25   | 4.22 | 0.327 | 0.101 | 1.274 | 2.69 | 0.164  | 0.247 | 14.05 | 0.041 | 0.642 | 34.98      |
|                           | MI4                           | 1           | 85.8           | 0.63           | 456406            |               | 209           | 41         |      |       |        |      |       |       |       |      |        |       |       |       |       |            |
|                           | MI3/5                         | 1.5         | 67.2           | 0.57           | 456406            |               | 95            | 339        |      |       |        |      |       |       |       |      |        |       |       |       |       |            |
|                           | MI6                           | 1.1         | 74.3           | 0.57           | 456406            |               | 53            | 389        |      |       |        |      |       |       |       |      |        |       |       |       |       |            |
|                           | MI7                           | 1           | 75.9           | 0.64           | 456406            |               | 41            | 53         |      |       |        |      |       |       |       |      |        |       |       |       |       |            |
|                           | MI8                           | 0.8         | 69.2           | 0.60           | 456406            |               | 12            | 59         |      |       |        |      |       |       |       |      |        |       |       |       |       |            |
|                           | MI9                           | 0.88        | 85.8           | 0.53           | 456406            |               | 164           | 98         |      |       |        |      |       |       |       |      |        |       |       |       |       |            |
| PumPlag7 MI               | Pumplag7 MI1                  | 1.14        | 76.2           | 0.58           | 952896            | 1072.00       | 334           | 169        |      |       |        |      |       |       |       |      |        |       |       |       |       |            |
|                           | MI7                           | 1.67        | 70.4           | 0.59           | 952896            | 1032.00       | 285           | 639        | 3.66 | 65.88 | 2.07   | 4.43 | 0.296 | 0.108 | 1.028 | 2.78 | 0.193  | 0.289 | 13.48 | 0.036 | 0.685 | 29.26      |
|                           | MI9                           | 1.16        | 74.2           | 0.58           | 952896            | 1087.00       | 209           | 306        | 4.73 | 67.25 | 1.47   | 4.64 | 0.272 | 0.135 | 1.157 | 3.68 | 0.111  | 0.206 | 13.94 | 0.049 | 0.598 | 30.78      |
|                           | MI6                           | 1.45        | 67.0           | 0.61           | 952896            | 1060.00       | 79            | 310        | 4.27 | 66.8  | 2.04   | 3.71 | 0.266 | 0.103 | 0.763 | 2.86 | 0.142  | 0.278 | 14.04 | 0.036 | 0.604 | 26.83      |
|                           | MI5                           | 1.73        | 67.0           | 0.61           | 952896            | 1008.00       | 108           | 594        | 4.16 | 66.63 | 2.33   | 4.97 | 0.272 | 0.108 | 1.493 | 2.68 | 0.202  | 0.276 | 13.83 | 0.040 | 0.593 | 34.87      |
|                           | MI4                           | 1.16        | 75.8           | 0.58           | 952896            | 1069.00       | 21            | 420        | 3.04 | 67.85 | 1.5    | 4.35 | 0.282 | 0.106 | 0.873 | 3.13 | 0.208  | 0.242 | 12.43 | 0.037 | 0.675 | 26.34      |
|                           | MI8                           | 1.57        | 67.0           |                | 952896            |               | 118           | 2109       |      |       |        |      |       |       |       |      |        |       |       |       |       |            |
| PumPlag8 MI               | Pumplag8 MI1                  | 0.86        | 82.9           | 0.56           | 1139286           | bd            | 272           | 143        | 4.63 | 58.8  | 1.65   | 4.21 | 0.217 | 0.138 | 1.131 | 6.86 | 0.140  | 0.159 | 19.69 | 0.039 | 0.511 | 32.39      |
|                           | MI5                           | 1.48        | 71.4           | 0.57           | 1139286           | 1067.00       | 234           | 258        | 3.97 | 66.11 | 1.96   | 3.34 | 0.241 | 0.112 | 0.694 | 2.97 | 0.160  | 0.288 | 13.75 | 0.040 | 0.690 | 27.04      |
|                           | MI1                           | 1           | 75.8           | 0.57           | 1139286           | 1098.00       | 250           | 335        | 3.86 | 66.09 | 1.9    | 4.28 | 0.268 | 0.097 | 0.828 | 3.38 | 0.189  | 0.279 | 13.74 | 0.050 | 0.677 | 25.65      |
|                           | MI4                           | 2.27        | 62.5           | 0.57           | 1139286           |               | 79            | 251        |      |       |        |      |       |       |       |      |        |       |       |       |       |            |
|                           | MI3                           | 0.75        | 76.2           | 0.63           | 1139286           | 1110.00       | 74            | 97         | 4.49 | 66.87 | 2.6    | 4.3  | 0.184 | 0.106 | 0.053 | 2.16 | <0.052 | 0.203 | 14.47 | 0.033 | 0.499 | 2.15       |
|                           | MI6                           | 0.43        | 85.0           | 0.63           | 1139286           | bd            | 47            | 105        | 4.3  | 64.72 | 2.02   | 4.38 | 0.262 | 0.101 | 1.178 | 3.02 | 0.195  | 0.210 | 14.62 | 0.040 | 0.531 | 32.41      |
|                           | Mlex6                         | 0.98        | 89.0           | 0.47           | 1139286           |               | 220           | 258        |      |       |        |      |       |       |       |      |        |       |       |       |       |            |
| Pum5 MI                   | Mlex8                         | 1.02        | 72.1           | 0.56           | 1139286           |               | 320           | 295        |      |       |        |      |       |       |       |      |        |       |       |       |       |            |
|                           | Pumplag5 MI1                  | 0.88        | 68.3           | 0.56           | 130519            |               | 128           | 118        |      |       |        |      |       |       |       |      |        |       |       |       |       |            |
|                           | MI2                           | 0.6         | 79.6           | 0.68           | 130519            | 1096.00       | 103           | 105        | 3.79 | 68.91 | 2.08   | 3.2  | 0.266 | 0.097 | 0.723 | 2.58 | 0.123  | 0.242 | 12.75 | 0.052 | 0.663 | 28.70      |
|                           | MI4                           | 1.16        | 77.9           | 0.57           | 130519            |               | 89            | 99         |      |       |        |      |       |       |       |      |        |       |       |       |       |            |
|                           | MI5                           | 0.93        | 77.9           | 0.57           | 130519            |               | 111           | 228        |      |       |        |      |       |       |       |      |        |       |       |       |       |            |
|                           | Mlex1                         | 0.86        | 79.6           | 0.68           | 130519            |               | 138           | 107        |      |       |        |      |       |       |       |      |        |       |       |       |       |            |
|                           | Mlex4                         | 1.46        | 75.0           | 0.64           | 130519            |               | 88            | 85         |      |       |        |      |       |       |       |      |        |       |       |       |       |            |
| Pum4 MI                   | Pumplag4 MI1                  | 1.67        | 71.1           | 0.58           | 1002022           | 1074.00       | 206           | 626        | 4.34 | 66.13 | 1.82   | 3.79 | 0.220 | 0.117 | 0.894 | 3.31 | 0.159  | 0.243 | 14.78 | 0.038 | 0.503 | 29.61      |
|                           | MI5                           | 0.99        | 71.4           | 0.65           | 1002022           | bd            | 75            | 188        | 5.36 | 61.2  | 1.0637 | 3.07 | 0.162 | 0.098 | 0.684 | 6.32 | 0.067  | 0.102 | 19.02 | 0.046 | 0.427 | 28.42      |
|                           | Mlex3                         | 1.25        | 71.8           | 0.59           | 1002022           |               | 360           | 108        |      |       |        |      |       |       |       |      |        |       |       |       |       |            |
|                           | Mlex4                         | 0.79        | 81.4           | 0.58           | 1002022           |               | 245           | 47         |      |       |        |      |       |       |       |      |        |       |       |       |       |            |
|                           | Mlex5                         | 1.42        | 68.1           | 0.56           | 1002022           |               | 226           | 103        |      |       |        |      |       |       |       |      |        |       |       |       |       |            |
|                           | Mlex2                         | 1.19        | 69.4           | 0.61           | 1002022           |               | 62            | 191        |      |       |        |      |       |       |       |      |        |       |       |       |       |            |
|                           | Mlex9                         | 1.19        | 69.4           | 0.61           | 1002022           |               | 34            | 87         |      |       |        |      |       |       |       |      |        |       |       |       |       |            |
| Pum6                      | Mlex6                         | 1.27        | 70.1           | 0.63           | 1002022           |               | 53            | 174        |      |       |        |      |       |       |       |      |        |       |       |       |       |            |
|                           | Mlex8                         | 0.5         | 81.0           |                | 1002022           |               | 56            | 323        |      |       |        |      |       |       |       |      |        |       |       |       |       |            |
|                           | Pumplag6 MI1                  | 0.97        | 83.0           |                | 1503561           |               | 314           | 338        |      |       |        |      |       |       |       |      |        |       |       |       |       |            |
|                           | Mlex3                         | 0.93        | 83.0           |                | 1503561           |               | 281           | 145        |      |       |        |      |       |       |       |      |        |       |       |       |       |            |
|                           | Mlex1                         | 1.37        | 71.0           |                | 1503561           |               | 361           | 1028       |      |       |        |      |       |       |       |      |        |       |       |       |       |            |
|                           | Mlex2                         | 1.63        | 65.0           |                | 1503561           |               | 147           | 277        |      |       |        |      |       |       |       |      |        |       |       |       |       |            |
|                           | Non-concentric zoned crystals |             |                |                |                   |               |               |            |      |       |        |      |       |       |       |      |        |       |       |       |       |            |
| Pumplag9                  | Pumplag9 MI1                  | 0.86        | 67             |                | 663816            | 985.00        | 253           | 789        | 3.19 | 64.32 | 2.79   | 6.29 | 0.242 | 0.174 | 2.790 | 2.02 | 0.134  | 0.202 | 12.16 | 0.051 | 0.593 | 44.16      |
|                           | MI2                           | 0.76        | 68             |                | 663816            | 1091.00       | 122           | 570        | 3.95 | 66.64 | 2.06   | 3.75 | 0.311 | 0.104 | 0.737 | 2.81 | 0.201  | 0.270 | 13.34 | 0.036 | 0.683 | 25.94      |
|                           | MI3                           | 1.04        | 81             |                | 663816            |               | 19            | 80         |      |       |        |      |       |       |       |      |        |       |       |       |       |            |
|                           | MI4                           | 1.05        | 71             |                | 663816            |               | 160           | 135        |      |       |        |      |       |       |       |      |        |       |       |       |       |            |
|                           | MI5                           | 0.91        | 77             |                | 663816            |               | 40            | 114        |      |       |        |      |       |       |       |      |        |       |       |       |       |            |
|                           | MI6                           | 0.89        | 77             |                | 663816            |               | 54            | 345        |      |       |        |      |       |       |       |      |        |       |       |       |       |            |
|                           | MI7                           | 1.04        | 63             |                | 663816            | 1025.00       | 76            | 255        | 3.67 | 64.45 | 2.27   | 4.92 | 0.294 | 0.153 | 1.386 | 2.19 | 0.146  | 0.282 | 12.4  | 0.046 | 0.697 | 33.43      |
| Pumplag3                  | MI6                           | 1.1         |                |                | 278237            |               | 139           | 198        |      |       |        |      |       |       |       |      |        |       |       |       |       |            |
|                           | MI5                           | 1.3         |                |                | 278237            |               | 192           | 155        |      |       |        |      |       |       |       |      |        |       |       |       |       |            |
|                           | MI3                           | 1.03        |                |                | 278237            |               | 44            | 132        |      |       |        |      |       |       |       |      |        |       |       |       |       |            |
| Pumplag2                  | MI3                           | 0.66        |                |                | 255285            |               | 132           | 52         |      |       |        |      |       |       |       |      |        |       |       |       |       |            |
|                           | MI4                           | 1.21        |                |                | 255285            |               | 98            | 70         |      |       |        |      |       |       |       |      |        |       |       |       |       |            |
|                           | MI5                           | 0.95        |                |                | 255285            |               | 32            | 312        |      |       |        |      |       |       |       |      |        |       |       |       |       |            |
|                           | MI7                           | 0.62        |                |                | 255285            |               | 64            | 52         |      |       |        |      |       |       |       |      |        |       |       |       |       |            |

*Table DR5. FTIR data from melt inclusions. Not all CO2 vaules could be measured, as some were below detection limit or unresolvable due to poor spectral resolution*

|                 | H2O wt %   | CO2 (ppm) |
|-----------------|------------|-----------|
| 2014PumMI1      | 1.27       | 336       |
| 2014PumMI1 0004 | 1.31       | 279       |
| 2014PumMI1 0005 | 0.525      | 33        |
| 2014PumMI1 0007 | 1.075      | 325       |
| 2014PumMI1 0010 | 0.455      |           |
| 2014PumMI1 0012 | 1.725      |           |
| 2014PumMI1 0014 | 1.6        |           |
| 2014PumMI1 0020 | 1.33       |           |
| 2014PumMI1 0021 | 0.9        |           |
| 2014PumMI1 0013 | 0.43       | 57        |
| 2014PumMI1 0018 | 2.33       |           |
| 2014PumMI1 0019 | 0.88       | 323       |
| 2014PumMI1 0022 | 0.76       |           |
| Min             | 0.43       |           |
| max             | 2.33       |           |
| average         | 1.12230769 |           |
